# Supplementary material
Source: Research Square preprint supplement (doi:10.21203/rs.3.rs-9217963/v1)
Supplement: Supplementary file 1 [file 1f4766dbd63e0b8df3323960.docx]

**Additional File 3: Focus Group Guide for Service Providers**

**1. Welcome and Introductions**

- Facilitators introduce themselves and explain the purpose of the focus group.
- Emphasise that the project team is looking for honest feedback to help improve processes and service delivery in Child and Family Health Services
- Assure participants their comments will remain confidential and reported only in a de-identified way. Confirm all participants have had the chance to read through the Participant Information Sheet, clarified questions, and submitted consent forms.
- Quick round of introductions (name, role)

**2. Topic questions**

When you think about the current intake, prioritisation, and allocation process, what comes to mind?

- - - - 1. What is working well?

**Prompts:**

- What aspects are working?
- What helps timely and appropriate care delivery?
- Tools and systems that help?
  1. What is not working so well? Why do you think this is happening?

**Prompts:**

- What are the barriers, delays or frustrations?
- Any resource, communication or technology issues that contribute to this?
  1. What parts of the process can be simplified? What parts don’t add value?

**Prompts:**

- Are there opportunities to reduce duplication?
- What would make the process better for families and staff?
- What else could be done to streamline the workflow?

1. **Additional Information**
   1. Do you have any other additional information that you would like to share that you haven’t got to mention?
