# Supplementary material
Source: Research Square preprint supplement (doi:10.21203/rs.3.rs-9217963/v1)
Supplement: Supplementary file 2 [file 2de71dbbe8599f2870d76f6b.docx]

**Additional File 2: A list of complete codes and themes**

| **Levesque’s Framework dimensions** | **List of codes** | **List of sub-themes** |
| --- | --- | --- |
| Approachability | Client communication barriers  Client limited literacy around child development  Intake officer elicitation skills | Navigating unclear referral |
| Repeated contact challenges  Cognitive load on intake team | Intake complexity and phone burden |
| *Ability to perceive* | Service awareness  Autonomy in help-seeking  Service navigation confusion | System complexity and fragmented pathways  Limited literacy around child development |
| Acceptability | Perception of inconsistent prioritisation  Variability in advocacy based on staff experience | Equity in service prioritisation |
| *Ability to seek* | Client trust in health system  Client cultural/language barrier | Client cultural acceptability of health services |
| Availability and accommodation | Double-handling inefficiency | Workflow duplication |
| Long wait times | High demand for the services |
| Interpreter coordination  Logistic coordination | Scheduling challenges |
| *Ability to reach* | Variation in service location accessibility  Travel barriers for vulnerable families | Geographic accessibility |
| Affordability | System gaps (digital infrastructure and inconsistent processes)  Knowledge gaps  Administrative overload | Operational burden from system inefficiencies  Time and workforce as hidden costs |
| *Ability to pay* | Free services facilitate care | Free service as an enabler to care access |
| Appropriateness | Referral complexity  Referral mismatches  Service-aligned intake expertise enhances referral appropriateness. | Referral pathway challenges |
| *Ability to engage* | Progressive disclosure through ongoing engagement  Clients lack awareness or readiness  Emotional overwhelm limits engagement | Family emotional readiness |
| Empowerment through information  Reminder-supported engagement  Lack of follow-up mechanism discourages ongoing engagement | Ongoing participation |
