# Supplementary material
Source: Research Square preprint supplement (doi:10.21203/rs.3.rs-9217963/v1)
Supplement: Supplementary file 4 [file cd37afde813abf2cb2303d30.docx]

**Additional File 4: Topic Guide for Semi-Structured Interviews (Service users)**

1. **Ice breaker**

How are you today? I would like to start by asking you a few questions about your background if that is ok?

**Prompts**

- Age
- Number of child/ren
- Age of child/ren
- Child and Family Health Services access

**Ability to perceive and to seek**

- - - 1. Can you describe some of the reasons why you required our child and family health services?

*Prompts: speech delay, not walking, difficulties with parenting,*

- - - 1. How did you find out about us?

*Prompts: nurse, general practitioner, friend, school*

**Ability to reach and pay**

- - - 1. When was the first time that you spoke to our service and for what health concern/s?

*Prompts: CHIL service, by the xxx clinician. Because my child was not… walking, talking etc*

- - - 1. What services have you accessed?

*Prompts: Any private services previously? Cost issues? Current SLHD CFH services?*

- - - 1. Was it easy to attend your appointments? Are there any ways we could make this easier?

*Prompts:* time of day, commute, centre based/home visiting

**Ability to engage**

- - - 1. How long did you wait before you received these services?

*Prompt: wait times for different services if accessed multiple.*

- - - 1. Currently, each of our services prioritise children and families with the greatest clinical need. *How do you think we should prioritise our referrals?*

*Prompt questions – first come first served basis, based on need, define need?*

**Anything else you would like to share that that you haven’t got to mention**

- Suggestions for service improvement
